# Supplementary material
Source: PubMed Central journal article supplement (PMC4637270)
Supplement: NIHMS722873-supplement-1.pdf [file NIHMS722873-supplement-1.pdf]

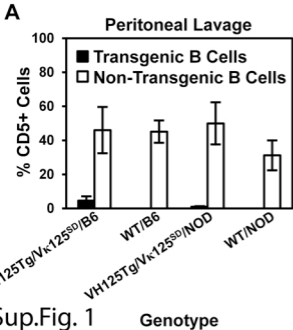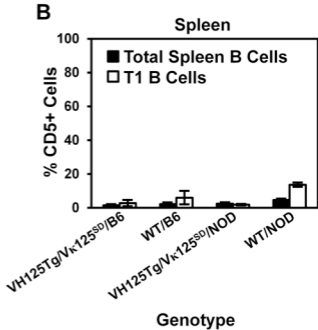

Sup.Fig. 1

**Supplemental Figure 1. VH125Tg/Vκ125<sup>SD</sup> B1 cell differentiation is impaired.** Peritoneal lavage or spleens were harvested from n = 6 WT/B6, n = 6 VH125Tg/Vκ125<sup>SD</sup>/B6, n = 3 WT/NOD, or n = 3 VH125Tg/Vκ125<sup>SD</sup>/NOD 9-13 week old male and female mice and flow cytometry was used to identify CD5<sup>+</sup> B1 cells. (A) The frequency of CD5<sup>+</sup> cells among transgenic (black bars, IgM<sup>a+</sup>, VH125Tg/Vκ125<sup>SD</sup> mice) or non-transgenic (white bars, IgM<sup>b+</sup>, WT mice; IgM<sup>a-</sup>, VH125Tg/Vκ125<sup>SD</sup> mice) B Cells (CD19<sup>+</sup> IgM<sup>+</sup> live lymphocytes) was assessed in peritoneal lavage. (B) Spleens were harvested and the frequency of CD5<sup>+</sup> cells among total B cells (black bars, B220<sup>+</sup> IgM<sup>+</sup> live lymphocytes) or T1 gated B cells (white bars, B220<sup>+</sup> CD21<sup>low</sup> CD23<sup>low</sup> IgM<sup>a high</sup> live lymphocytes) was assessed in the indicated genotype. The average ± SD is shown.

Supplemental Table I. Number of non-insulin-binding or insulin-binding B cells following insulin autoantigen-targeted therapy of anti-insulin VH125Tg/Vκ125<sup>SD</sup>/NOD mice<sup>a</sup>

|                                | Immature <sup>b, c</sup> | T1 <sup>b, c</sup> | T2 <sup>b, c</sup> | Follicular <sup>b, c</sup> | Pre-Marginal Zone <sup>b, c</sup> | Marginal Zone <sup>b, c</sup> |
|--------------------------------|--------------------------|--------------------|--------------------|----------------------------|-----------------------------------|-------------------------------|
| Untreated, Non-Insulin-Binding | 0.18 ± 0.07              | 18 ± 14            | 21 ± 6             | 26 ± 13                    | 0.97 ± 0.99                       | 33 ± 21                       |
| mAb123, Non-Insulin-Binding    | 0.37 ± 0.08              | 91 ± 15            | 162 ± 10           | 40 ± 29                    | 6.9 ± 2.8                         | 75 ± 29                       |
| Untreated, Insulin-Binding     | 7.0 ± 2.3                | 987 ± 776          | 834 ± 128          | 1530 ± 674                 | 83 ± 83                           | 3229 ± 2360                   |
| mAb123, Insulin-Binding        | 3.7 ± 2.1                | 285 ± 301          | 776 ± 303          | 4383 ± 1357                | 194 ± 43                          | 977 ± 1290                    |

<sup>a</sup> Spleen or bone marrow was freshly isolated 2-7 d after single i.p. injection of mAb123, n = 2 untreated mice, n = 3 mAb123-treated mice

<sup>b</sup> Gated as in Fig. 6B

<sup>c</sup> Average number of cells x 10<sup>3</sup> ± standard deviation. Statistical analysis was not performed.

Supplemental Table II. Number of non-insulin-binding or insulin-binding B cells following insulin autoantigen-targeted therapy of anti-insulin VH125Tg/Vκ125<sup>SD</sup>/RAG2-GFP/B6 mice<sup>a</sup>

|                                | Immature <sup>b, c, d</sup> | T1 <sup>b, c, d</sup> | T2 <sup>b, c, d</sup> | Follicular <sup>b, c, d</sup> | Pre-Marginal Zone <sup>b, c, d</sup> | Marginal Zone <sup>b, c, d</sup> |
|--------------------------------|-----------------------------|-----------------------|-----------------------|-------------------------------|--------------------------------------|----------------------------------|
| Untreated, Non-Insulin-Binding | 3.3 ± 2.9                   | 17 ± 13               | 67 ± 40               | 194 ± 139                     | 10 ± 10                              | 69 ± 42                          |
| mAb123, Non-Insulin-Binding    | 58 ± 54**                   | 106 ± 129**           | 162 ± 169             | 139 ± 100                     | 8.9 ± 6.9                            | 62 ± 26                          |
| Untreated, Insulin-Binding     | 43 ± 24                     | 247 ± 258             | 1532 ± 1123           | 5366 ± 3740                   | 338 ± 256                            | 2513 ± 1062                      |
| mAb123, Insulin-Binding        | 410 ± 256**                 | 294 ± 328             | 242 ± 210**           | 3181 ± 2696                   | 64 ± 77*                             | 135 ± 98**                       |

<sup>a</sup> Spleen or bone marrow was freshly isolated 1d after final i.p. injection of mAb123 (injected every 2 d for 1 wk), n ≥ 6 mice per group

<sup>b</sup> Gated as in Fig. 7A

<sup>c</sup> Average number of cells x 10<sup>3</sup> ± standard deviation

<sup>d</sup> \*\* p < 0.01, Mann Whitney test, two tailed, mAb123 compared to untreated

Supplemental Table III. Number of insulin-binding or non-insulin-binding B cells following short-term insulin autoantigen-targeted therapy in VH125Tg/NOD mice<sup>a</sup>

|                                              | Immature <sup>b, c, d</sup> | T1 <sup>b, c, d</sup> | T2 <sup>b, c, d</sup> | Follicular <sup>b, c, d</sup> | Marginal Zone <sup>b, c, d</sup> | Pancreatic Draining Lymph Nodes <sup>b, c, d</sup> |
|----------------------------------------------|-----------------------------|-----------------------|-----------------------|-------------------------------|----------------------------------|----------------------------------------------------|
| Untreated, Insulin-binding                   | 3.9 ± 1.7                   | 6.3 ± 2.7             | 15.4 ± 10.3           | 25.9 ± 12.4                   | 21.5 ± 8.2                       | 1.9 ± 1.7                                          |
| F(ab') <sub>2</sub> 123, Insulin-binding     | 3.8 ± 1.3                   | 5.6 ± 3.9             | 8.6 ± 4.7             | 47.5 ± 22.2                   | 27.0 ± 12.6                      | 1.2 ± 0.65                                         |
| mAb123, Insulin-Binding                      | 1.2 ± 0.5*                  | 0.75 ± 0.58*          | 0.63 ± 0.36*          | 29.5 ± 15.9                   | 6.7 ± 7.6*                       | 0.44 ± 0.13*                                       |
| Untreated, Non-Insulin-Binding               | 576 ± 321                   | 593 ± 257             | 1615 ± 892            | 2526 ± 1054                   | 1715 ± 784                       | 94 ± 36                                            |
| F(ab') <sub>2</sub> 123, Non-Insulin-Binding | 588 ± 192                   | 780 ± 435             | 1943 ± 685            | 3258 ± 943                    | 2183 ± 700                       | 104 ± 48                                           |
| mAb123, Non-Insulin-Binding                  | 498 ± 127                   | 682 ± 164             | 1867 ± 668            | 2860 ± 1345                   | 1797 ± 722                       | 64 ± 12                                            |

<sup>a</sup> Spleen or bone marrow was freshly isolated 1-2 d after single i.p. injection of indicated therapy, n = 5 mice per group

<sup>b</sup> Gated as in Fig. 8B

<sup>c</sup> Average number of cells x 10<sup>3</sup> ± standard deviation

<sup>d</sup> \* p < 0.05, \*\* p < 0.01, Mann Whitney test, two tailed, as compared to untreated
